# Supplementary material
Source: PubMed Central journal article supplement (PMC6581455)

Figure S1

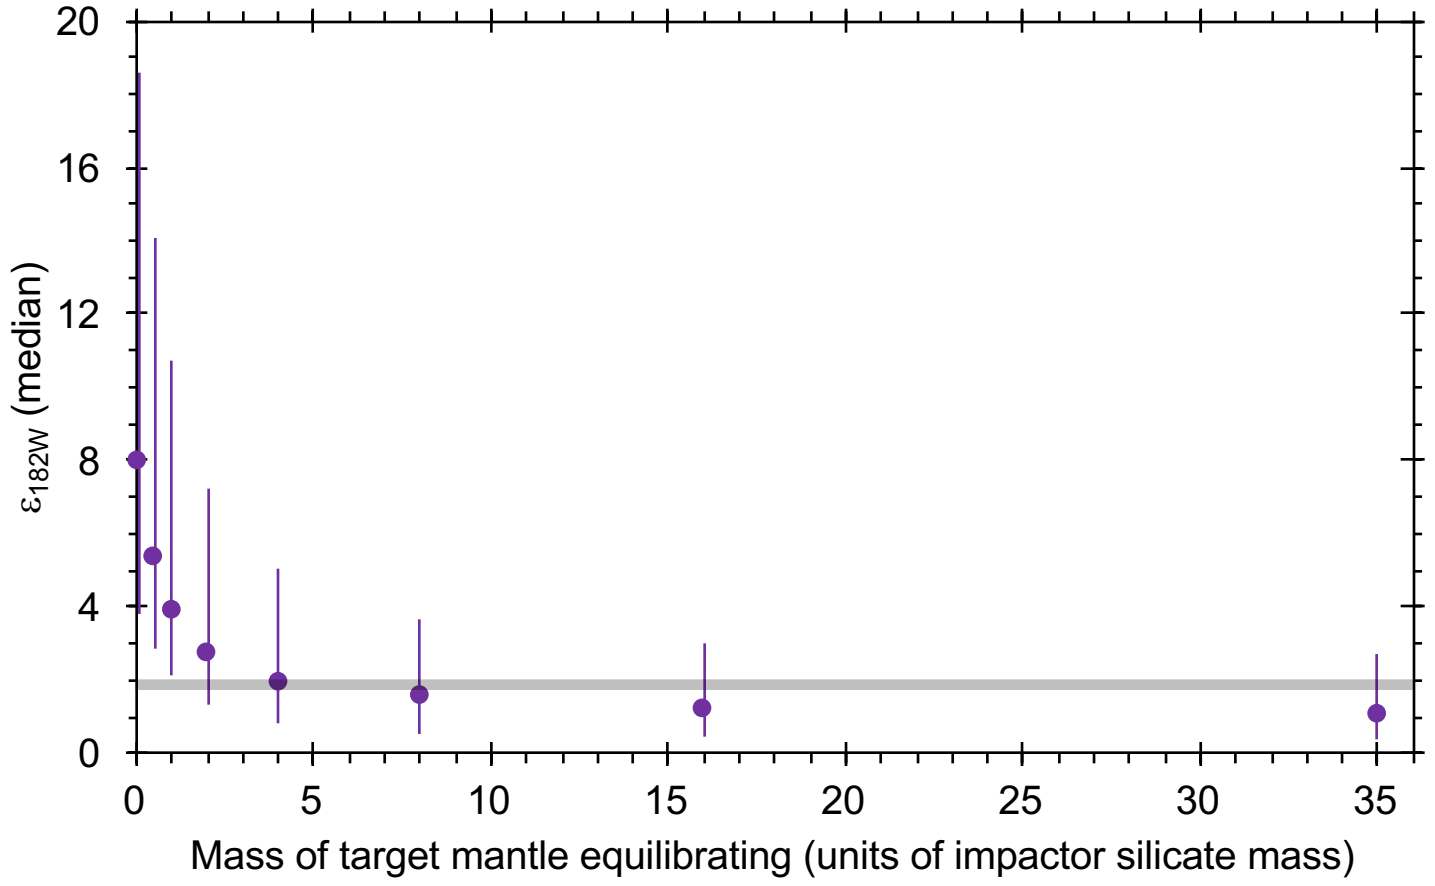

Figure S2

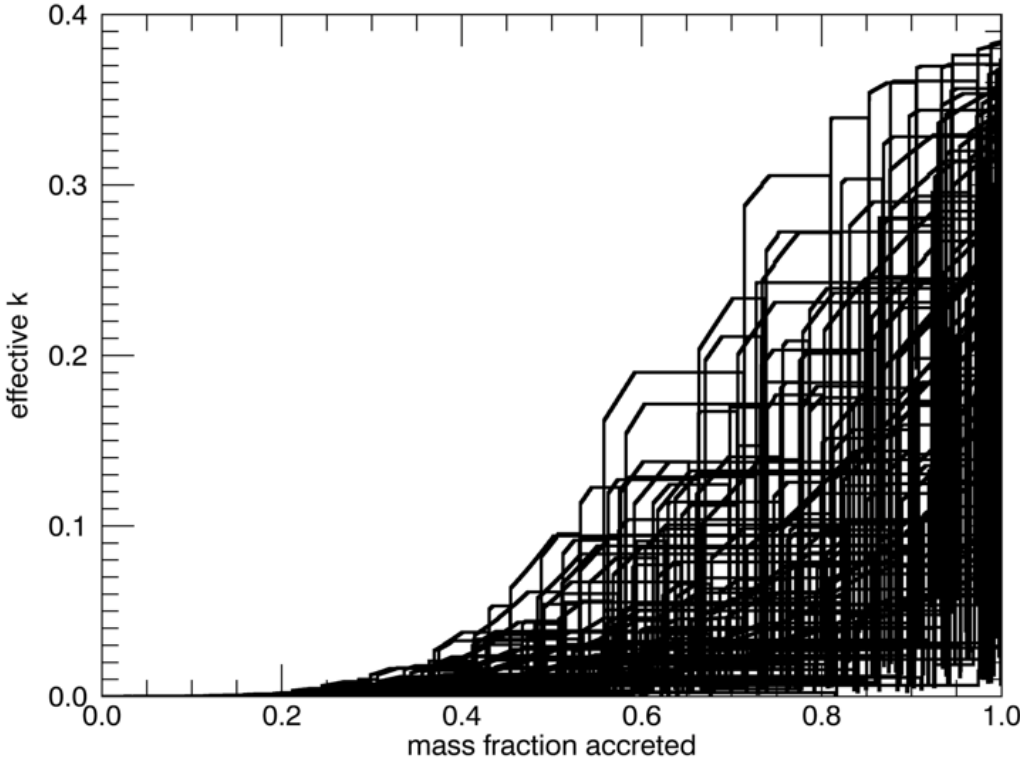

Figure S3

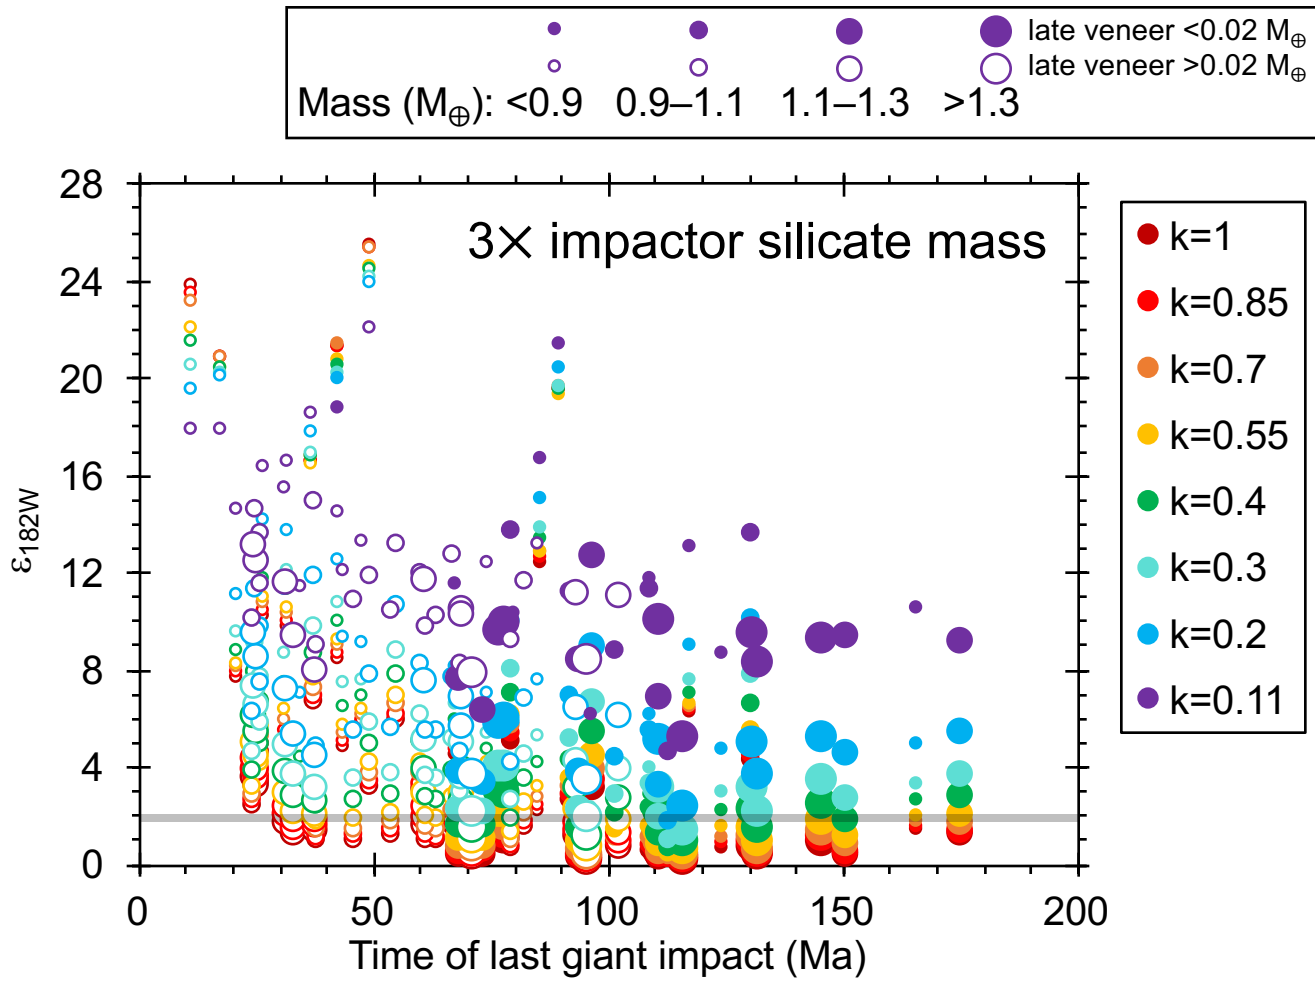

Figure S4

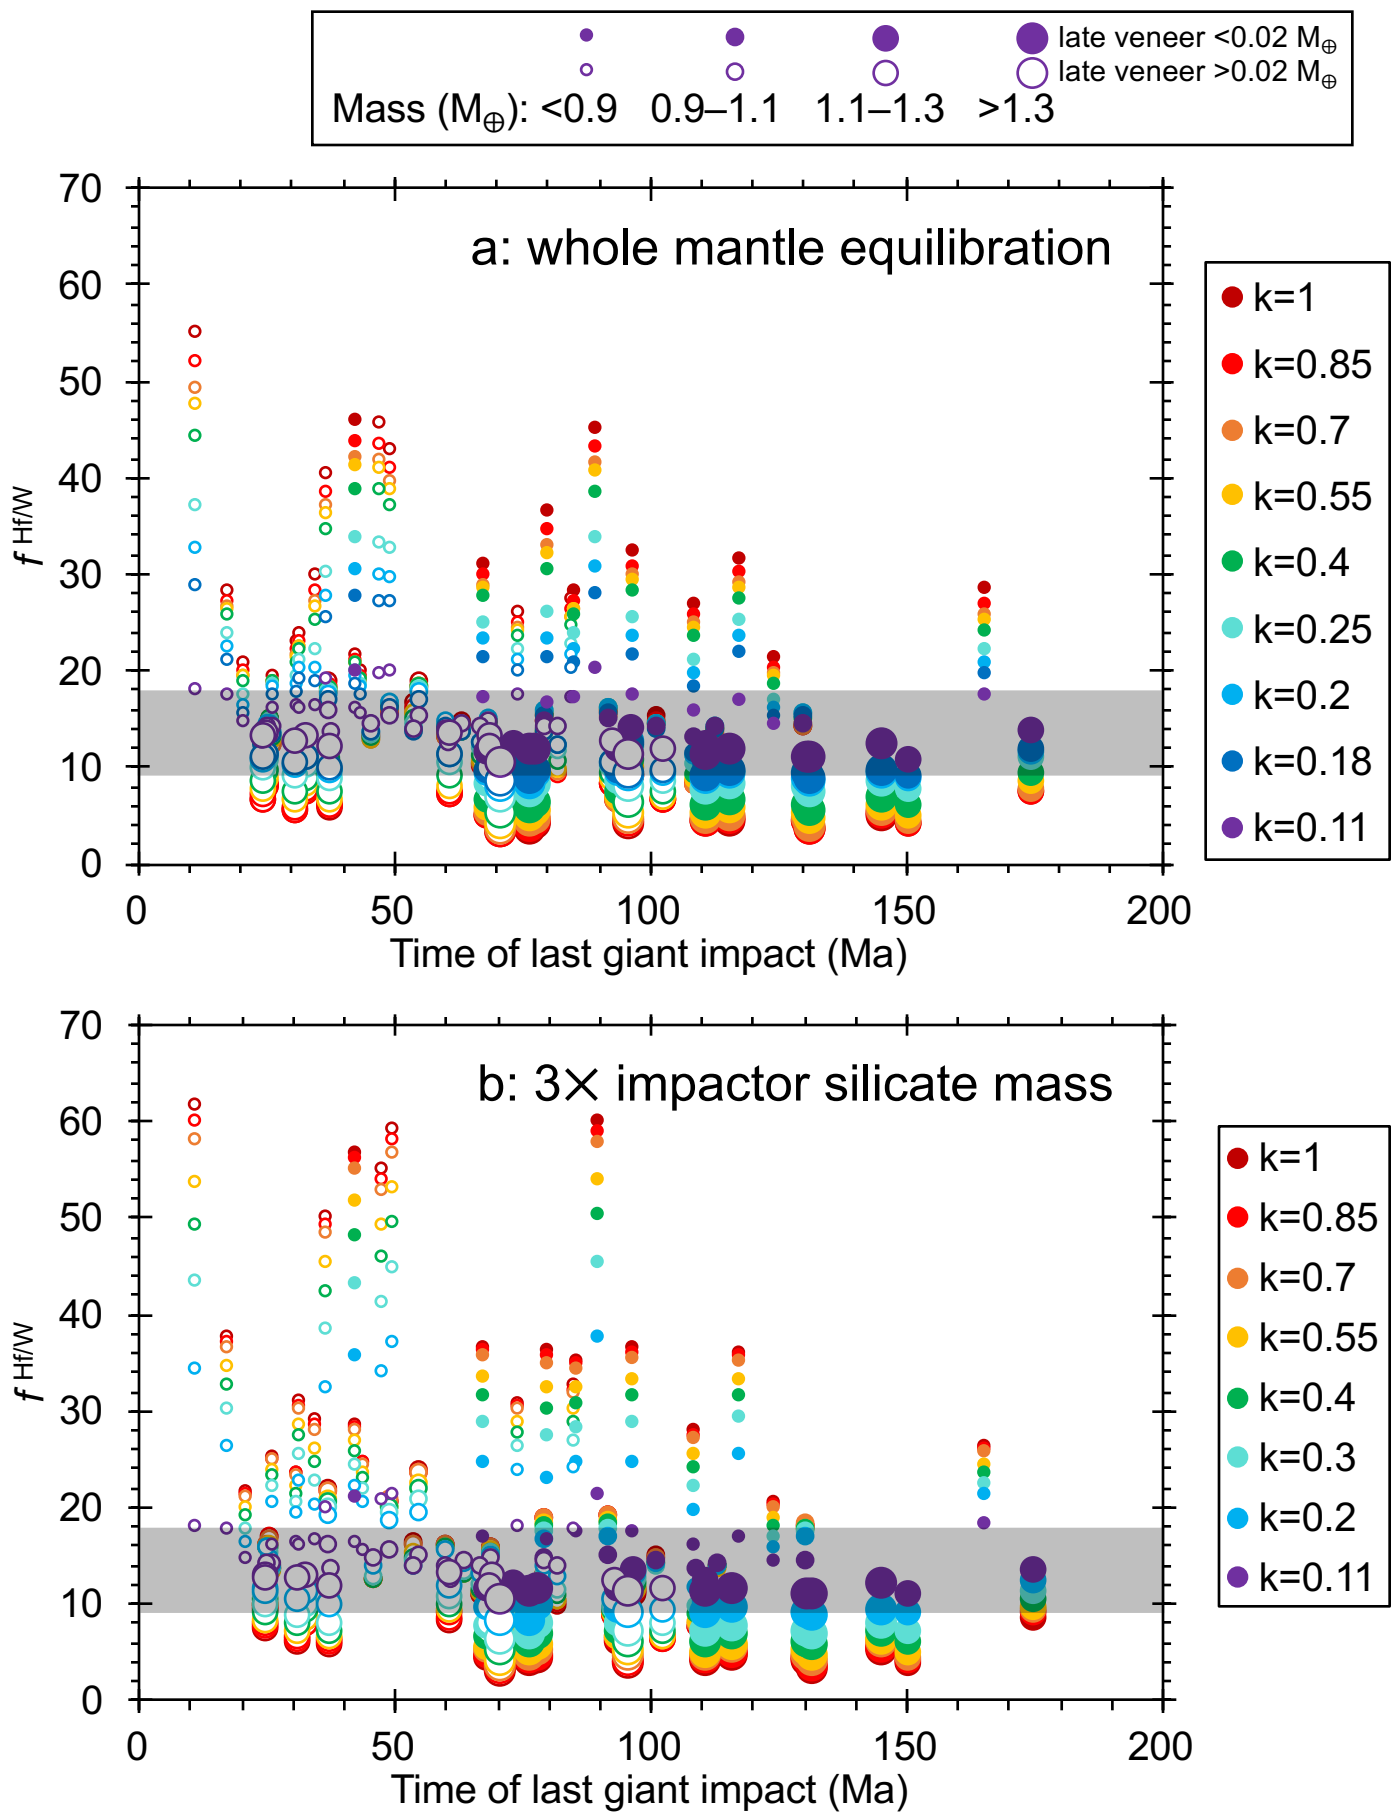

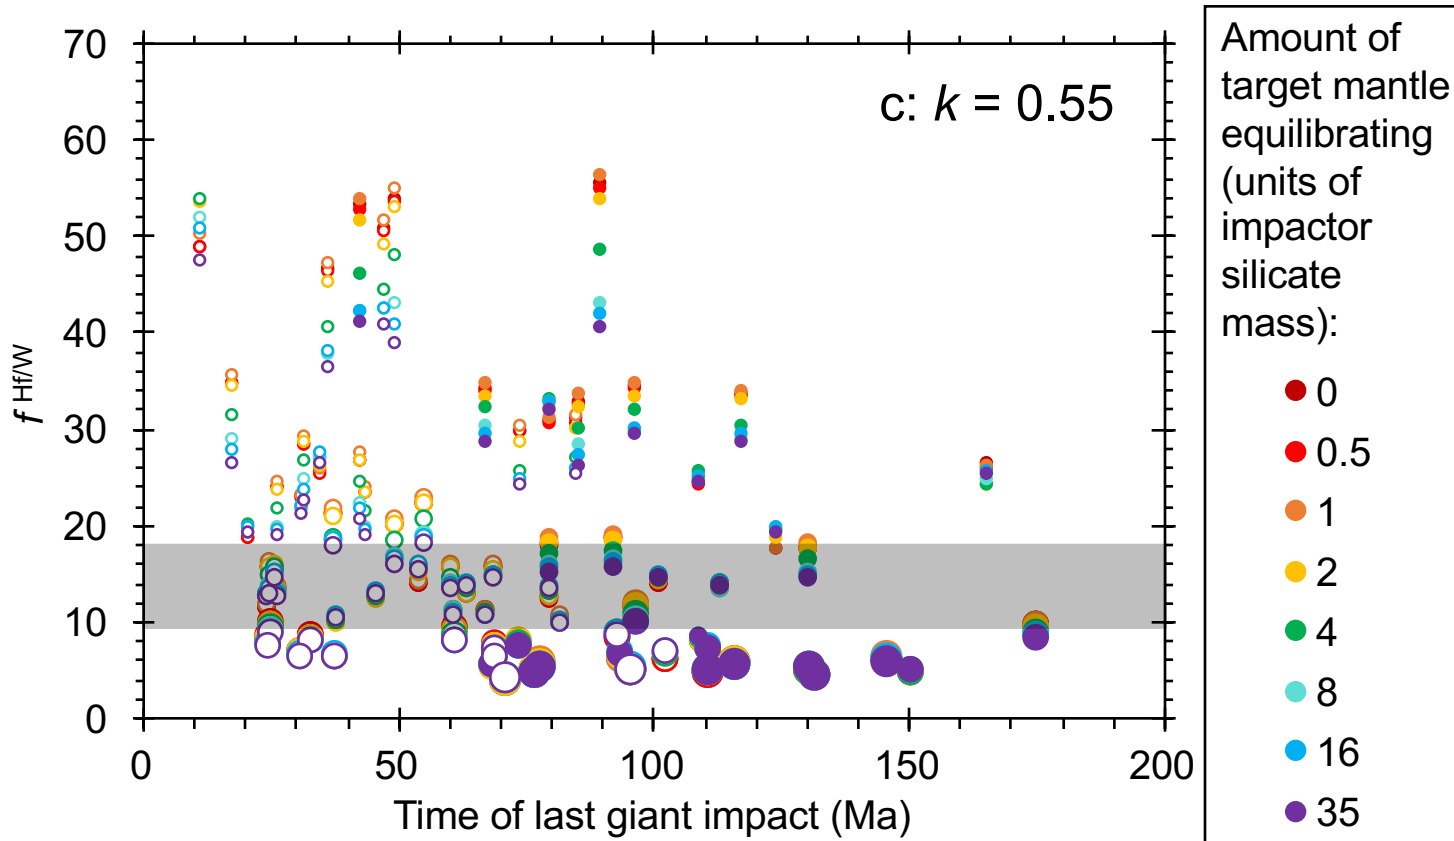

Supplement: NIHMS1024207-supplement-Fig_S1-S4.pdf [file NIHMS1024207-supplement-Fig_S1-S4.pdf]
